# Supplementary material
Source: publisher figshare collection journal article supplement (https://karger.figshare.com/ndownloader/files/22674842)
Supplement: Supplementary file 1 [file 22674842]

Legends

Video 1. HS deroofing

Deroofing is performed under local anesthesia. A double-ended fistula probe is used to identify the extent if tunneling. Scissors and forceps are used to remove the roof of the sinus. Continued probing uncovers extension of the sinus in multiple directions, and sequential unroofing of each area leads to a clean dermal wound base with beveled edges.

Video 2. HS excision

Under local anesthesia, a large ellipse is marked. Excision is performed to the superficial subcutaneous plane. A healthy adipose layer without deeper extension of scarring or sinuses is exposed. A layered closure is later performed in a curvilinear fashion. Based on patient preference for wound closure, some disease remains at the margins with plans for a second stage if needed in the future to remove residual disease.
